# Supplementary material for: Sensory and Chemical Characteristic of Two Insect Species: Tenebrio molitor and Zophobas morio Larvae Affected by Roasting Processes
Source: MDPI journal article supplement (doi:10.3390/molecules26092697), 2021-05-04
Supplement: s1 [file s1]

## Supplementary materials

### Selected chromatograms:

S1:

TMBCI

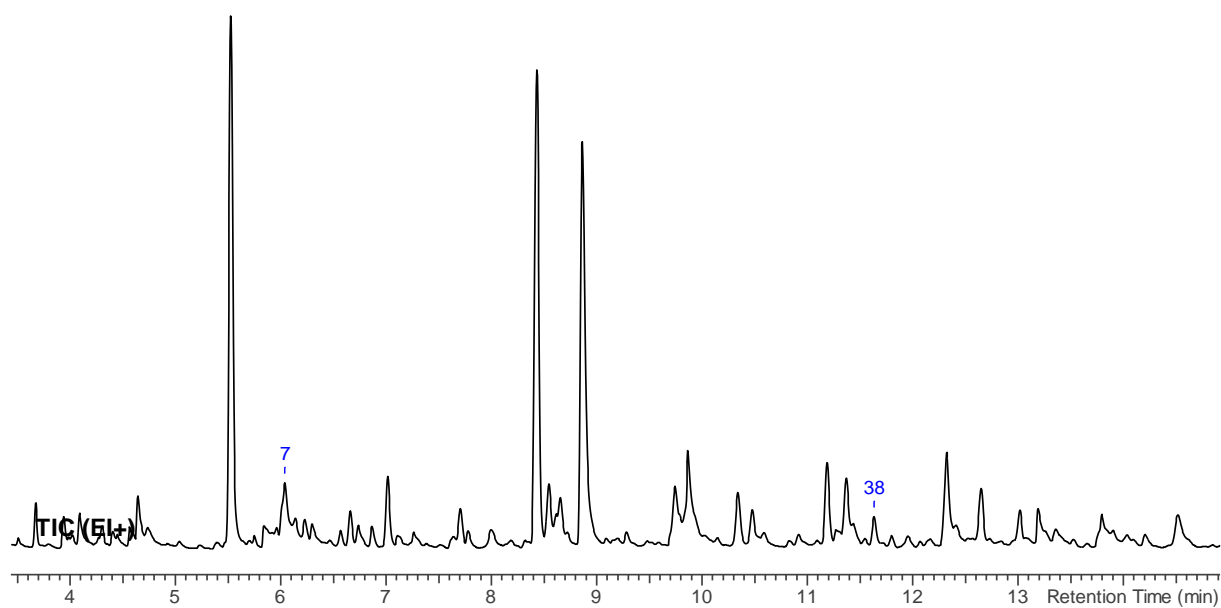

S2:

TMBCII

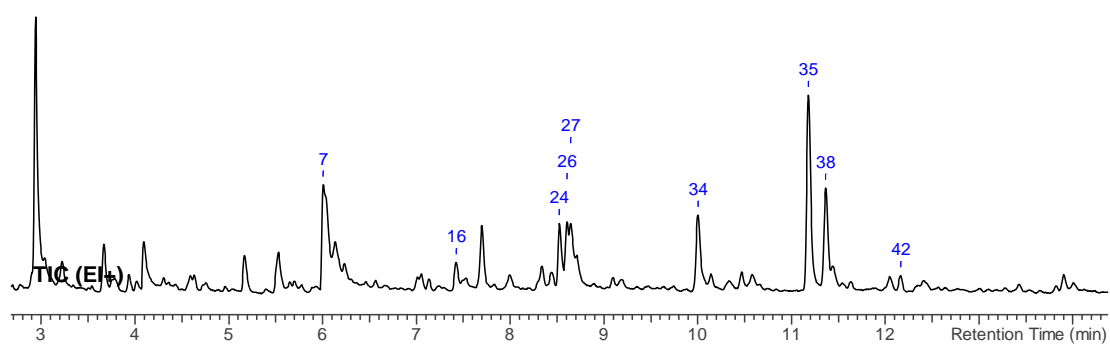

S3:

TMBCIII

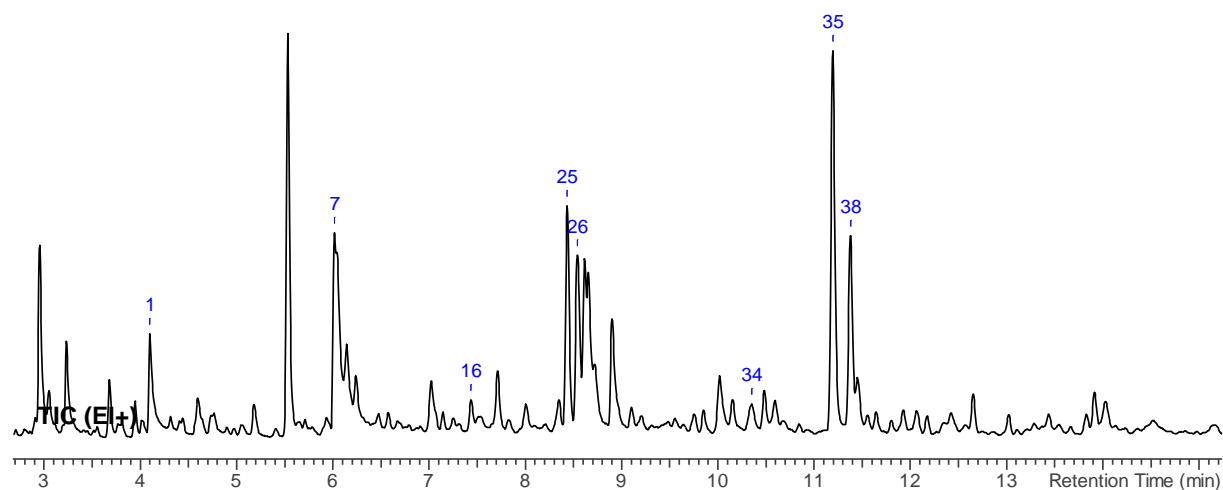

S4:

ZMBCI

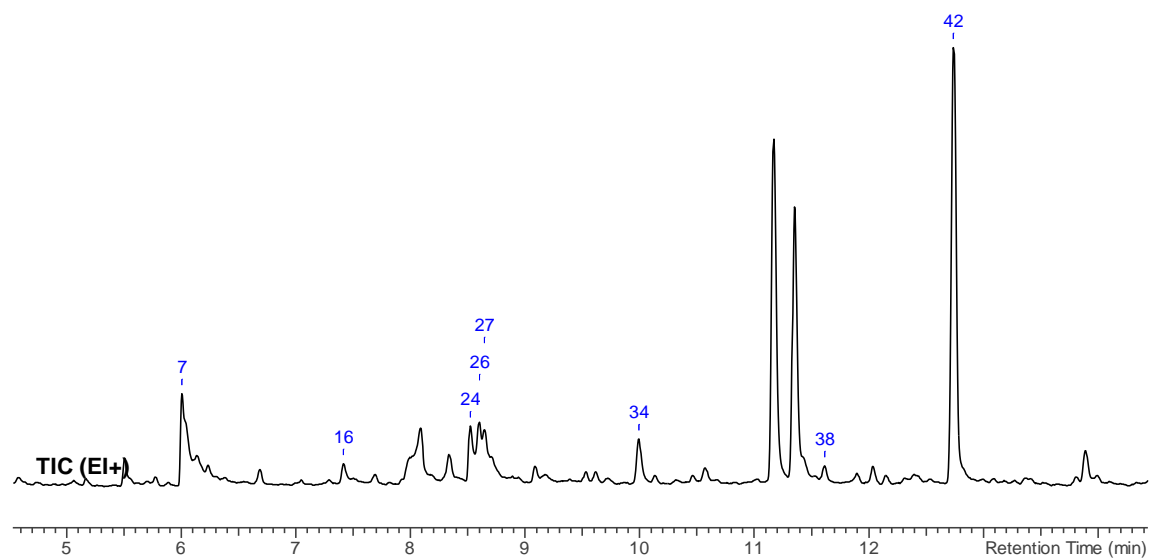

S5:

ZMBCII

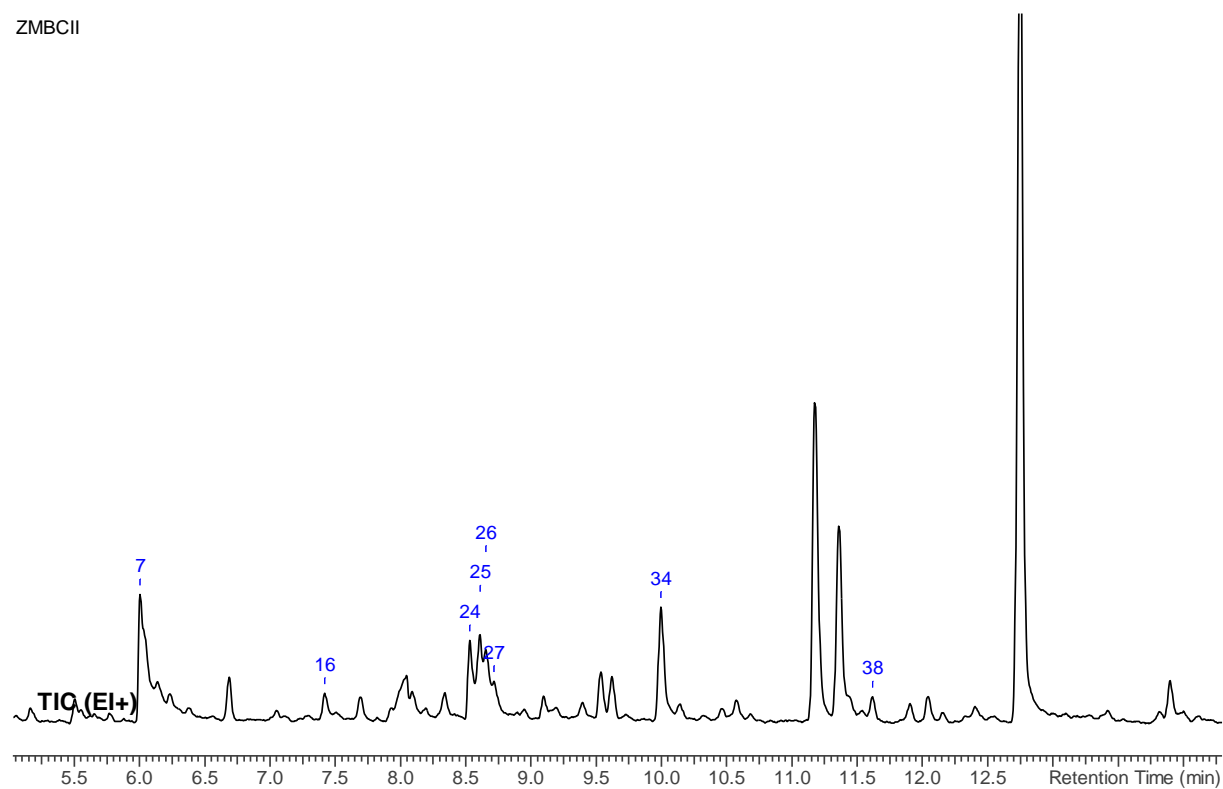

S6:

ZMBCIII

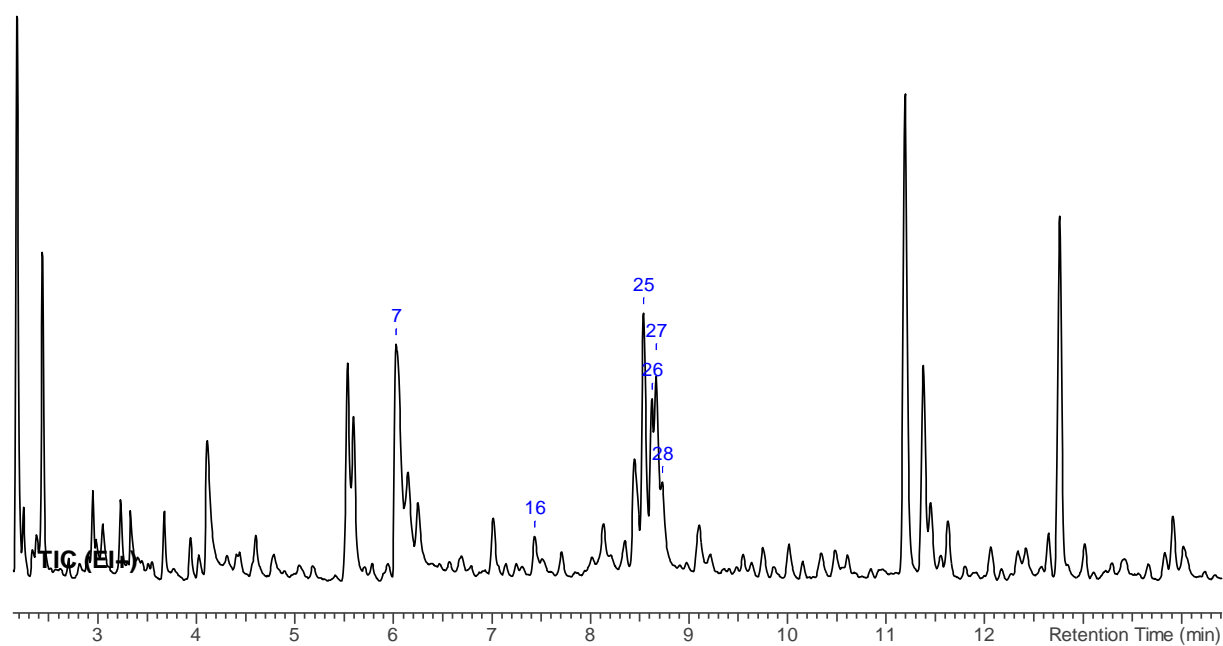

S7:

TMPS1

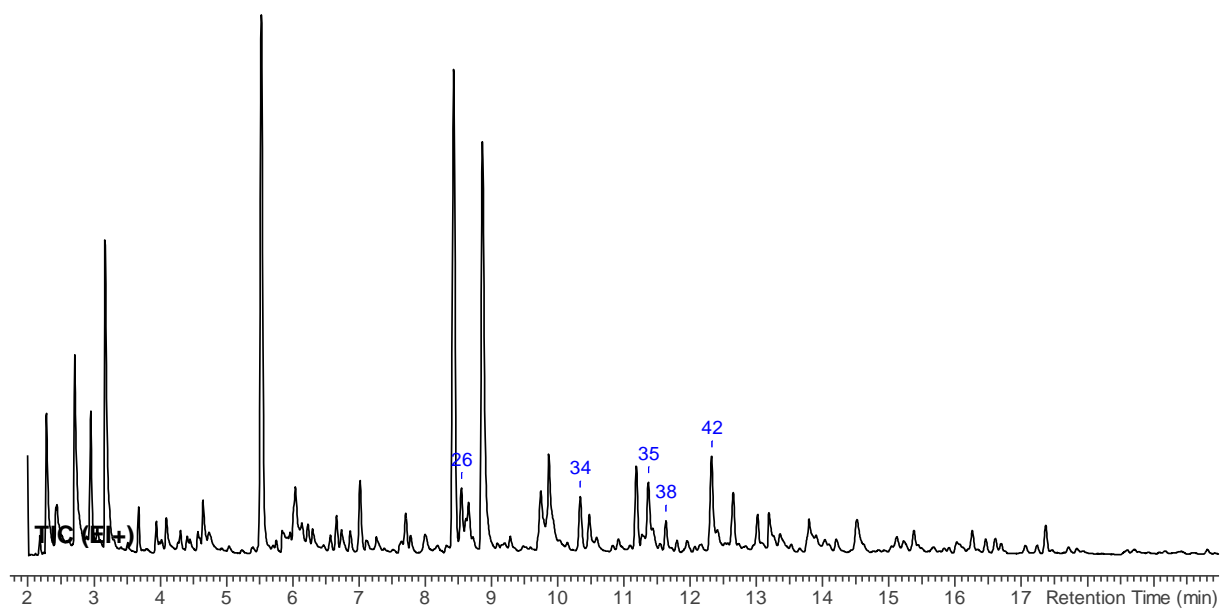

S8:

TMPSII

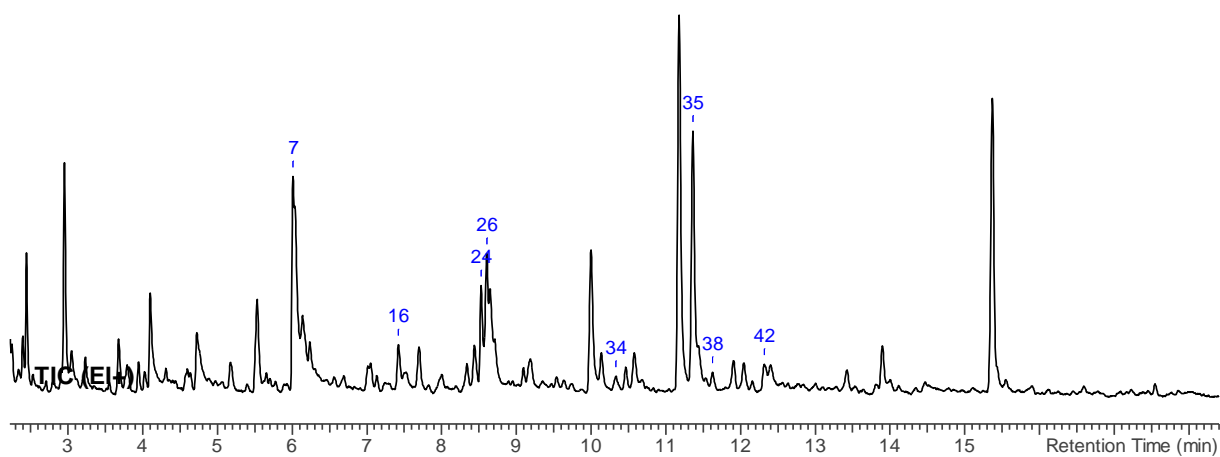

S9:

TMPSIII

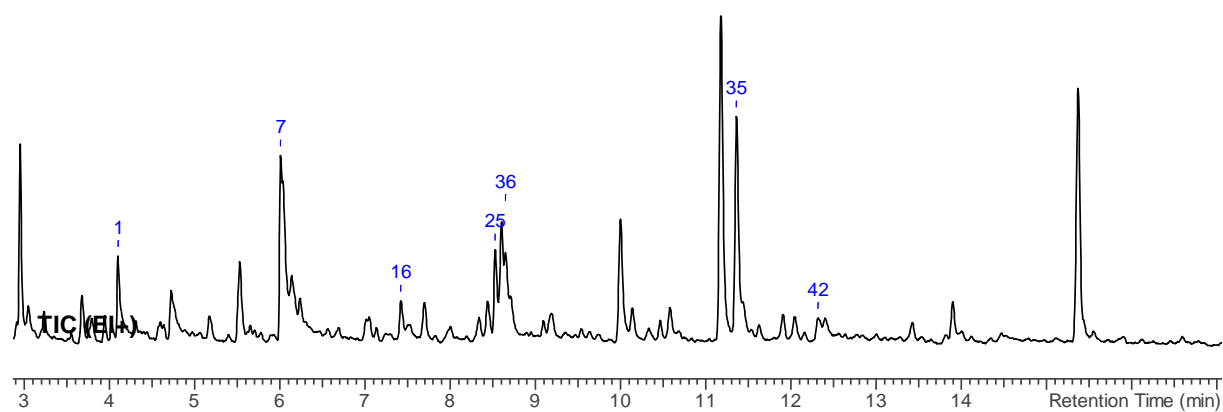

S10:

ZMPSI

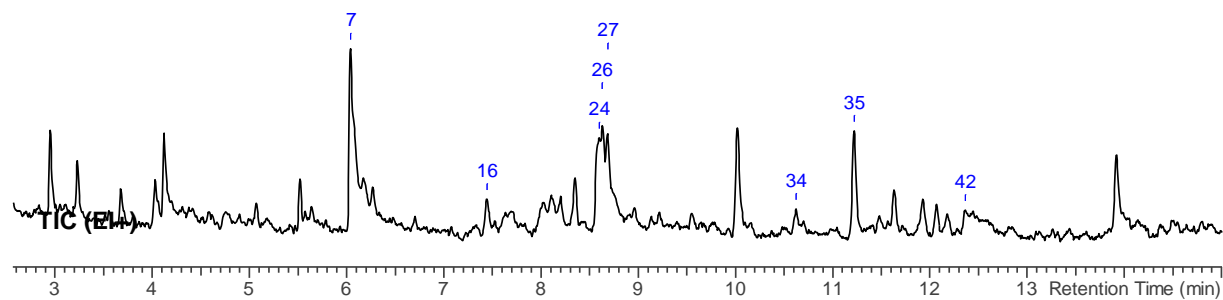

S11:

ZMPSII

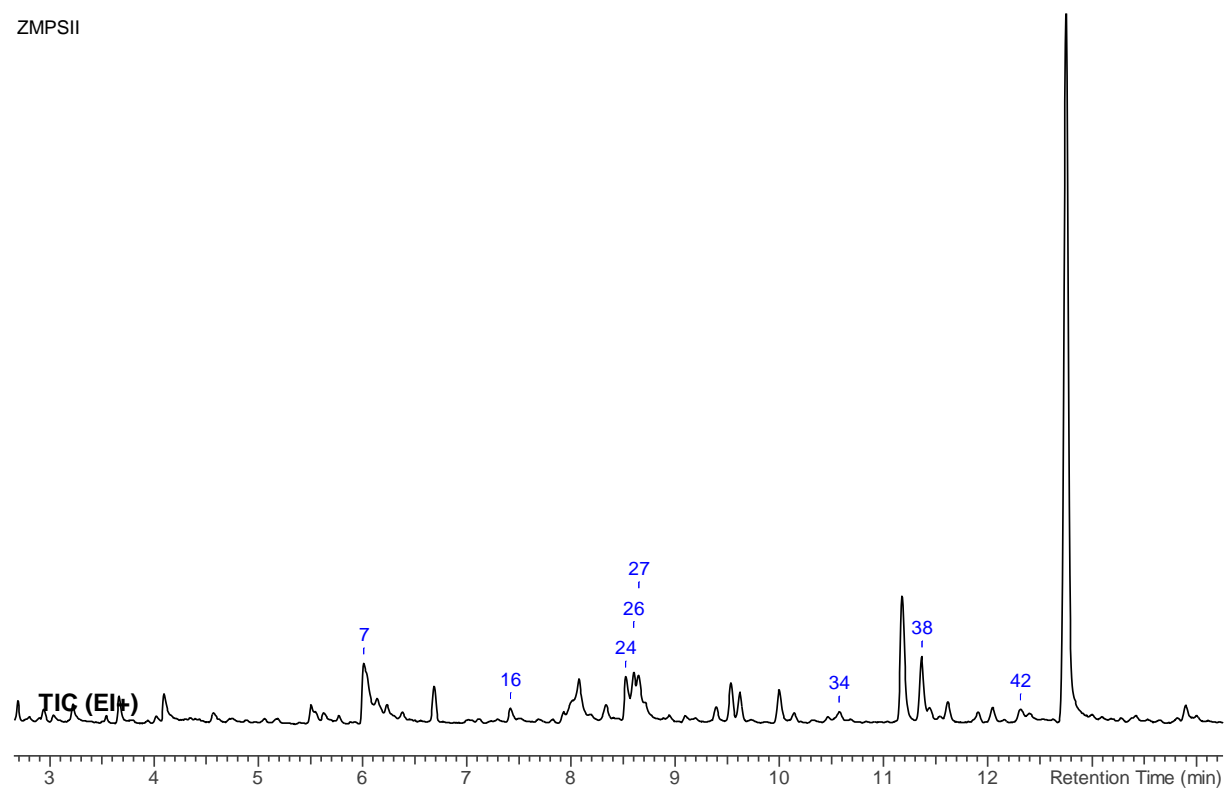

S12:

ZMPSIII

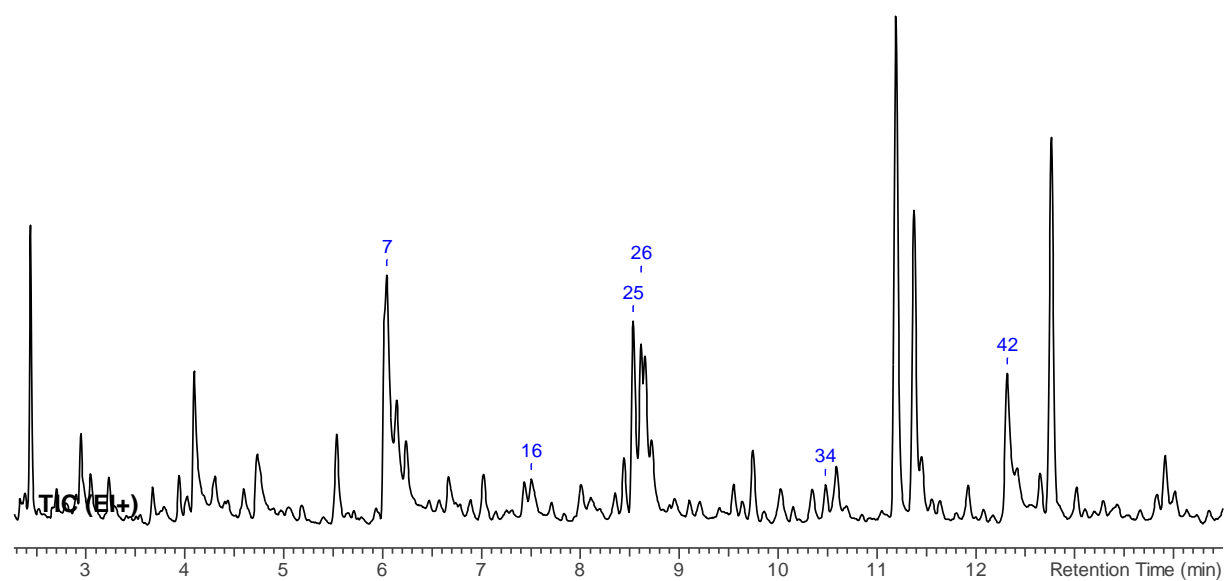

TABLES:

S13:

**Table S1.** Concentration and odor activity values of aroma active compounds (OAV) and %OAV of roasted *Tenebrio molitor* larvae.

| No | Compound                 | TMPS I        |          |       | TMPSII        |         |       | TMPS III      |          |       | TMBCI         |       |       | TMBCII        |          |       | TMBCIII       |         |       |
|----|--------------------------|---------------|----------|-------|---------------|---------|-------|---------------|----------|-------|---------------|-------|-------|---------------|----------|-------|---------------|---------|-------|
|    |                          | ppm<br>[μg/g] | OAV      | %OAV  | ppm<br>[μg/g] | OAV     | %OAV  | ppm<br>[μg/g] | OAV      | %OAV  | ppm<br>[μg/g] | OAV   | %OAV  | ppm<br>[μg/g] | OAV      | %OAV  | ppm<br>[μg/g] | OAV     | %OAV  |
| 1  | Furan-2-carbaldehyde     | n.d.          | -        | -     | n.d.          | -       | -     | 0.745±0.096   | 75.079   | 4.30  | n.d.          | -     | -     | n.d.          | -        | -     | 0.055±0.008   | 11.110  | 1.65  |
| 7  | 2,5-Dimethylpyrazine     | n.d.          | -        | -     | 0.044±0.005   | 0.436   | 0.14  | 0.049±0.006   | 61.491   | 3.52  | 0.098±0.007   | 0.980 | 69.56 | 0.437±0.011   | 4.366    | 0.20  | 0.049±0.003   | 73.491  | 10.88 |
| 16 | Benzaldehyde             | n.d.          | -        | -     | 0.006±0.003   | 128.446 | 42.59 | 0.002±0.001   | 518.089  | 29.67 | n.d.          | -     | -     | 0.076±0.0030  | 10.591   | 0.49  | 0.005±0.003   | 157.840 | 23.37 |
| 24 | 2-Ethyl-6-methylpyrazine | n.d.          | -        | -     | 0.012±0.003   | 0.119   | 0.04  | n.d.          | -        | -     | n.d.          | -     | -     | 0.167±0.012   | 1.672    | 0.08  | n.d.          | -       | -     |
| 25 | 2-Ethyl-5-methylpyrazine | n.d.          | -        | -     | n.d.          | -       | -     | 0.058±0.004   | 0.004    | 0.00  | n.d.          | -     | -     | n.d.          | -        | -     | 0.063±0.009   | 0.004   | 0.00  |
| 26 | 2,3,5-Trimethylpyrazine  | 0.031±        | 0.309    | 0.01  | 0.013±0.004   | 0.132   | 0.04  | 0.048±0.003   | 0.485    | 0.03  | n.d.          | -     | -     | 0.189±0.013   | 1.893    | 0.09  | 0.046±0.005   | 0.456   | 0.07  |
| 27 | 2-Ethyl-3-methylpyrazine | n.d.          | -        | -     | n.d.          | -       | -     | n.d.          | -        | -     | n.d.          | -     | -     | 0.095±0.008   | 0.789    | 0.037 | n.d.          | -       | -     |
| 34 | Isobutylpyrazine         | 0.054±        | 3357.173 | 99.24 | 0.003±0.002   | 170.044 | 56.38 | 0.017±0.002   | 1080.254 | 61.86 | n.d.          | -     | -     | 0.033±0.007   | 2092.090 | 97.22 | 0.011±0.004   | 423.158 | 62.64 |
| 35 | Oct-2-en-1-ol            | 0.027±        | 22.180   | 0.66  | 0.003±0.001   | 2.294   | 0.76  | 0.012±0.002   | 9.999    | 0.57  | n.d.          | -     | -     | 0.048±0.006   | 39.793   | 1.85  | 0.011±0.002   | 9.391   | 1.39  |

|    |                     |        |       |      |                 |       |      |                 |       |      |                 |       |       |                 |       |      |                 |       |      |
|----|---------------------|--------|-------|------|-----------------|-------|------|-----------------|-------|------|-----------------|-------|-------|-----------------|-------|------|-----------------|-------|------|
| 38 | Nona<br>n-2-<br>one | 0.025± | 0.246 | 0.01 | 0.003±<br>0.002 | 0.026 | 0.01 | n.d.            | -     | -    | 0.043±<br>0.003 | 0.429 | 30.44 | 0.022±<br>0.003 | 0.220 | 0.01 | 0.006±<br>0.003 | 0.062 | 0.01 |
| 42 | Malto<br>l          | 0.108± | 3.094 | 0.09 | 0.004±<br>0.001 | 0.119 | 0.04 | 0.032±<br>0.004 | 0.918 | 0.05 | n.d.            | -     | -     | 0.022±<br>0.002 | 0.614 | 0.03 | n.d.            | -     | -    |

**S14:**

**Table S2.** Concentration and odor activity values of aroma active compounds (OAV) and %OAV of roasted *Zophobas morio* larvae.

| No | Compound                 | ZMPS I          |       |       | ZMPS II         |       |      | ZMPS III        |       |       | ZMBCI           |       |      | ZMBCII          |       |       | ZMBCIII         |       |       |
|----|--------------------------|-----------------|-------|-------|-----------------|-------|------|-----------------|-------|-------|-----------------|-------|------|-----------------|-------|-------|-----------------|-------|-------|
|    |                          | ppm<br>[µg/g]   | OAV   | %OAV  | ppm<br>[µg/g]   | OAV   | %OAV | ppm<br>[µg/g]   | OAV   | %OAV  | ppm<br>[µg/g]   | OAV   | %OAV | ppm<br>[µg/g]   | OAV   | %OAV  | ppm<br>[µg/g]   | OAV   | %OAV  |
| 1  | Furan-2-carbaldehyde     | n.d.            | -     | -     | n.d.            | -     | -    | n.d.            | -     | -     | n.d.            | -     | -    | n.d.            | -     | -     | n.d.            | -     | -     |
| 7  | 2,5-Dimethylpyrazine     | 0.011±<br>0.002 | 0.112 | 0.05  | 0.028±<br>0.005 | 0.280 | 1.35 | 0.457±<br>0.037 | 4.566 | 6.53  | 0.030±<br>0.005 | 0.298 | 2.03 | 0.052±<br>0.006 | 0.522 | 6.01  | 0.063±<br>0.027 | 0.627 | 11.79 |
| 16 | Benzaldehyde             | 0.004±<br>0.002 | 0.005 | 0.002 | 0.003±<br>0.001 | 0.004 | 0.02 | 0.006±<br>0.002 | 0.008 | 0.01  | 0.004±<br>0.001 | 0.005 | 0.03 | 0.825±<br>0.073 | 1.031 | 11.89 | 0.655±<br>0.89  | 0.819 | 15.39 |
| 24 | 2-Ethyl-6-methylpyrazine | 0.014±<br>0.001 | 0.141 | 0.06  | 0.012±<br>0.001 | 0.119 | 0.57 | n.d.            | -     | -     | 0.013±<br>0.003 | 0.126 | 0.85 | 0.008±<br>0.001 | 0.084 | 0.97  | n.d.            | -     | -     |
| 25 | 2-Ethyl-5-methylpyrazine | n.d.            | -     | -     | n.d.            | -     | -    | 0.037±<br>0.004 | 0.002 | 0.003 | n.d.            | -     | -    | 0.009±<br>0.003 | 0.001 | 0.01  | 0.047±<br>0.09  | 0.003 | 0.06  |
| 26 | 2,3,5-Trimethylpyrazine  | 0.021±<br>0.003 | 0.205 | 0.09  | 0.014±<br>0.002 | 0.136 | 0.65 | 0.027±<br>0.011 | 0.271 | 0.39  | 0.013±<br>0.005 | 0.126 | 0.86 | 0.009±<br>0.003 | 0.086 | 0.99  | 0.036±<br>0.007 | 0.362 | 6.80  |
| 27 | 2-Ethyl-3-methylpyrazine | 0.004±<br>0.002 | 0.035 | 0.02  | 0.014±<br>0.003 | 0.113 | 0.54 | n.d.            | -     | -     | 0.002±<br>0.001 | 0.021 | 0.14 | 0.004±<br>0.003 | 0.030 | 0.35  | 0.011±<br>0.002 | 0.088 | 1.65  |



|    |                  |             |         |       |               |        |       |              |        |       |               |        |       |                |       |       |                 |       |       |
|----|------------------|-------------|---------|-------|---------------|--------|-------|--------------|--------|-------|---------------|--------|-------|----------------|-------|-------|-----------------|-------|-------|
| 34 | Isobutylpyrazine | 0.003±0.001 | 217.343 | 98.76 | 0.0003±0.0001 | 19.969 | 96.17 | 0.001±0.0005 | 64.042 | 91.60 | 0.0002±0.0001 | 13.976 | 94.95 | 0.0001±0.00007 | 6.838 | 78.83 | 0.00005±0.00002 | 3.424 | 64.32 |
| 35 | Oct-2-en-1-ol    | 0.002±0.001 | 1.602   | 0.73  | n.d.          | -      | -     | n.d.         | -      | -     | n.d.          | -      | -     | n.d.           | -     | -     | n.d.            | -     | -     |
| 38 | Nona-2-one       | n.d.        | -       | -     | 0.003±0.001   | 0.031  | 0.15  | n.d.         | -      | -     | 0.002±0.001   | 0.018  | 0.12  | 0.008±0.002    | 0.083 | 0.95  | n.d.            | -     | -     |
| 42 | Malto-1          | 0.022±0.004 | 0.624   | 0.28  | 0.004±0.002   | 0.114  | 0.55  | 0.036±0.007  | 1.025  | 1.47  | 0.005±0.002   | 0.151  | 1.02  | n.d.           | -     | -     | n.d.            | -     | -     |

S15:

Table S3. Aroma profile of the roasted at 160 °C *Tenebrio molitor* larvae fed BC or PS.

| descriptor    | TMBCI    | TMPSI     |
|---------------|----------|-----------|
| roasted bacon | 9.1±0.9a | 7.9±0.11b |
| bread         | 4.1±0.3a | 3.2±0.5b  |
| oily          | 2.3±0.3a | 2.9±0.5b  |
| burnt         | 3.5±0.4a | 4.8±0.6b  |
| malty         | 5.8±0.7a | 5.2±0.7b  |

Mean values with different letters (a–b) within the same row were statistically different ( $p = 0.05$ ), the same letters form one homogeneous group. Values expressed as mean ± standard deviation.

S16:

Table S4. Aroma profile of the roasted at 180 °C *Tenebrio molitor* larvae fed BC or PS.

| descriptor    | TMBCII   | TMPSII   |
|---------------|----------|----------|
| roasted bacon | 5.2±0.9a | 5.3±0.7a |
| bread         | 7.8±1.1a | 5.2±0.8b |
| oily          | 5.1±0.9a | 4.3±0.6b |
| burnt         | 4.4±0.9b | 5.1±0.3a |
| malty         | 3.0±0.4a | 3.0±0.6a |

Mean values with different letters (a–b) within the same row were statistically different ( $p = 0.05$ ), the same letters form one homogeneous group. Values expressed as mean ± standard deviation.

S17:

Table S5. Aroma profile of the roasted at 200 °C *Tenebrio molitor* larvae fed BC or PS.

| descriptor    | TMBCIII  | TMPSIII  |
|---------------|----------|----------|
| roasted bacon | 3.1±0.6a | 2.1±0.8a |
| bread         | 6.1±0.5a | 6.2±0.9a |
| oily          | 7.0±0.4a | 7.1±1.0a |
| burnt         | 7.2±0.9b | 8.0±1.0a |
| malty         | 3.1±0.4a | 2.3±0.5b |

Mean values with different letters (a–b) within the same row were statistically different ( $p = 0.05$ ), the same letters form one homogeneous group. Values expressed as mean  $\pm$  standard deviation.

S18:

Table S6. Aroma profile of the roasted at 160 °C *Zophobas morio* larvae fed BC or PS.

| descriptor    | ZMBCI    | ZMPSEI   |
|---------------|----------|----------|
| roasted bacon | 7.1±1.1a | 8.2±0.9b |
| bread         | 6.2±0.7a | 3.2±0.6b |
| oily          | 6.1±0.9a | 6.3±0.6b |
| burnt         | 5.1±1.2a | 6.1±0.3b |
| malty         | 5.2±0.7a | 4.2±0.6b |

Mean values with different letters (a–b) within the same row were statistically different ( $p = 0.05$ ), the same letters form one homogeneous group. Values expressed as mean  $\pm$  standard deviation.

S19

Table S7. Aroma profile of the roasted at 180 °C *Zophobas morio* larvae fed BC or PS.

| descriptor    | ZMBCII   | ZMPSEII  |
|---------------|----------|----------|
| roasted bacon | 7.2±0.6a | 7.1±0.8a |
| bread         | 2.4±0.6b | 3.1±0.6a |
| oily          | 5.1±0.7a | 5.1±0.8a |
| burnt         | 7.0±1.1a | 7.1±0.8a |
| malty         | 7.0±0.9a | 7.0±1.2a |

Mean values with different letters (a–b) within the same row were statistically different ( $p = 0.05$ ), the same letters form one homogeneous group. Values expressed as mean  $\pm$  standard deviation.

S20:

Table S8. Aroma profile of the roasted at 200 °C *Zophobas morio* larvae fed BC or PS.

| descriptor    | ZMBCIII  | ZMPSIII  |
|---------------|----------|----------|
| roasted bacon | 6.9±0.5a | 6.1±0.4b |
| bread         | 2.0±0.7a | 2.1±0.4a |
| oily          | 5.0±0.6a | 4.2±0.5b |
| burnt         | 8.0±0.7b | 9.0±1.3a |
| malty         | 4.1±0.7a | 3.0±0.7b |

Mean values with different letters (a–b) within the same row were statistically different ( $p = 0.05$ ), the same letters form one homogeneous group. Values expressed as mean  $\pm$  standard deviation.
